# Supplementary material for: Genetic Analysis in Drosophila Reveals a Role for the Mitochondrial Protein P32 in Synaptic Transmission
Source: PubMed Central journal article supplement (PMC3276185; doi:10.1534/g3.111.001586), 2012-01-01
Supplement: supp_2.1.59_FigureS1.pdf [file supp_2.1.59_FigureS1.pdf]

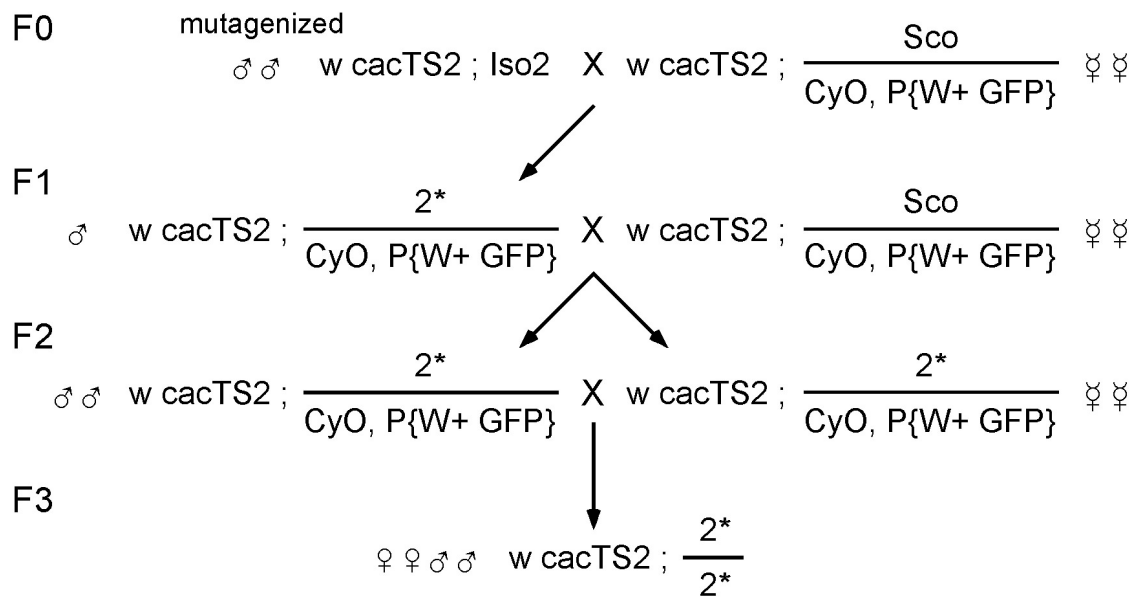

**Figure S1** A Genetic Screen for Second Chromosome Modifiers of *cac<sup>TS2</sup>*. *cac<sup>TS2</sup>* males with an isogenized second chromosome were exposed to the mutagen, ethylmethane sulphonate (EMS). Mutagenized males were mated with *cac<sup>TS2</sup>* females carrying the visible second chromosome marker, *Scutoid* (*Sco*), in trans to a *Curly of Oster* (*CyO*) balancer chromosome carrying a GFP transgene marked with *w<sup>+</sup>*. The F1 male progeny were backcrossed to F0 females. After mating F2 heterozygous siblings, F3 flies homozygous for a mutagenized second chromosome in a *cac<sup>TS2</sup>* genetic background were screened for altered *cac<sup>TS2</sup>* behavior at 36°C. \* ; mutagenized chromosome
