# Supplementary material for: Genetic Analysis in Drosophila Reveals a Role for the Mitochondrial Protein P32 in Synaptic Transmission
Source: PubMed Central journal article supplement (PMC3276185; doi:10.1534/g3.111.001586), 2012-01-01
Supplement: supp_2.1.59_FigureS4.pdf [file supp_2.1.59_FigureS4.pdf]

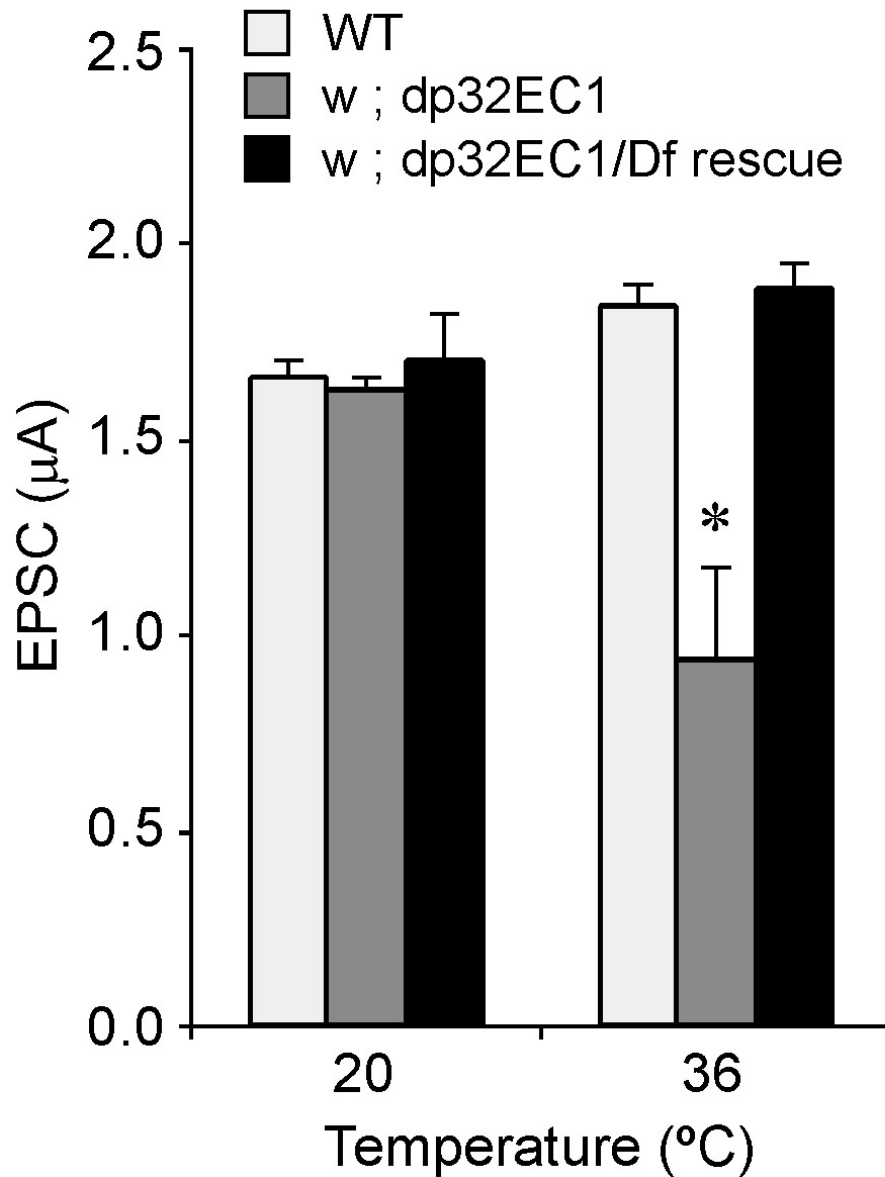

**Figure S4** Presynaptic Expression of Wild-Type dP32 Rescues the *dp32<sup>EC1</sup>* Synaptic Phenotype. Mean EPSC amplitudes in WT and the *dp32<sup>EC1</sup>* mutant, as well as the *dp32<sup>EC1</sup>* mutant expressing wild-type dP32 in the nervous system (*dp32EC1/Df* rescue). At 36°C, the EPSC amplitude in *dp32<sup>EC1</sup>/Df* rescue [ $1.89 \pm 0.07 \mu\text{A}$  ( $n = 5$ )] was not significantly different from that in WT ( $p = 0.65$ ). The data for WT and *dp32<sup>EC1</sup>* are the same as in Figure 2.
