# Supplementary material for: Genetic Analysis in Drosophila Reveals a Role for the Mitochondrial Protein P32 in Synaptic Transmission
Source: PubMed Central journal article supplement (PMC3276185; doi:10.1534/g3.111.001586), 2012-01-01
Supplement: supp_2.1.59_FigureS5.pdf [file supp_2.1.59_FigureS5.pdf]

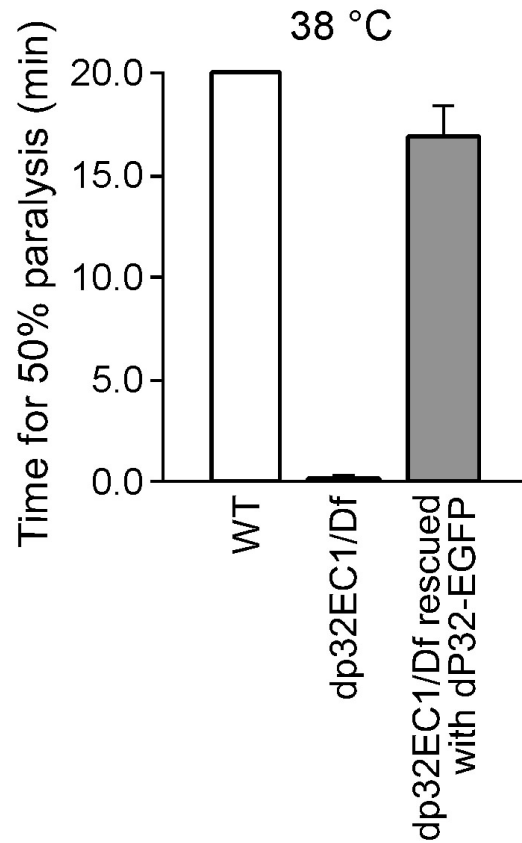

**Figure S5** Presynaptic Expression of dP32-EGFP Rescues the  $dp32^{EC1}$  Paralytic Phenotype. Rescue of TS paralysis in the  $dp32^{EC1}$  mutant was examined at 38°C. The time for 50% paralysis was increased from  $11.2 \pm 3.12$  sec ( $n = 5$ ) in  $dp32^{EC1}$  (dp32EC1/Df) to  $16.9 \pm 1.48$  min ( $n = 5$ ) in  $dp32^{EC1}$  expressing dP32-EGFP in the nervous system (dp32EC1/Df rescued with dP32-EGFP). The WT behavioral test was truncated after 20 minutes. These results demonstrate that the dP32-EGFP fusion protein retains its function. The data for WT and  $dp32^{EC1}$  are the same as in Figure 1B.
