# Supplementary material for: Genetic Analysis in Drosophila Reveals a Role for the Mitochondrial Protein P32 in Synaptic Transmission
Source: PubMed Central journal article supplement (PMC3276185; doi:10.1534/g3.111.001586), 2012-01-01
Supplement: supp_2.1.59_FigureS6.pdf [file supp_2.1.59_FigureS6.pdf]

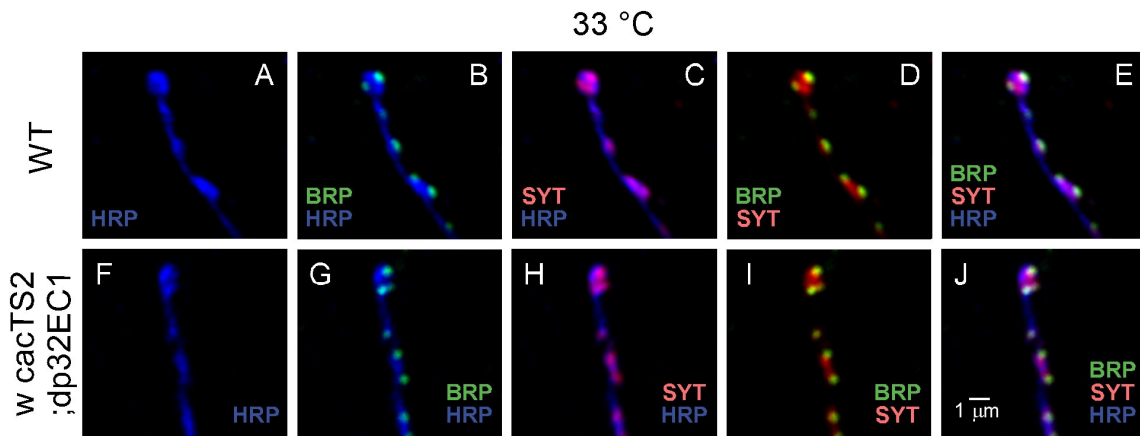

**Figure S6** Preservation of Presynaptic Composition in the *dp32<sup>EC1</sup>* Mutant. Confocal immunofluorescence images of adult DLM neuromuscular synapses in WT and *w cac<sup>TS2</sup>; dp32<sup>EC1</sup>* double mutants. Dissected preparations were exposed to a restrictive temperature of 33°C for 10 minutes and then fixed for processing. At this temperature, double mutant synapses exhibit a severe reduction in EPSC amplitude (Figure 2)]. Anti-HRP labels the neuronal plasma membrane such that the motor axon and its presynaptic boutons (swellings) are visualized. Anti-BRP labels presynaptic active zones. Anti-SYNTOTAGMIN (SYT) labels synaptic vesicles.
